# Supplementary material for: Multiple introductions and gene flow in subtropical South American populations of the fireweed, Senecio madagascariensis(Asteraceae)
Source: PubMed Central journal article supplement (PMC4807391; doi:10.1590/1678-4685-gmb-2015-0167), 2016
Supplement: 1415-4757-gmb-39-1-135-Suppl02.pdf [file 1415-4757-gmb-39-1-135-Suppl02.pdf]

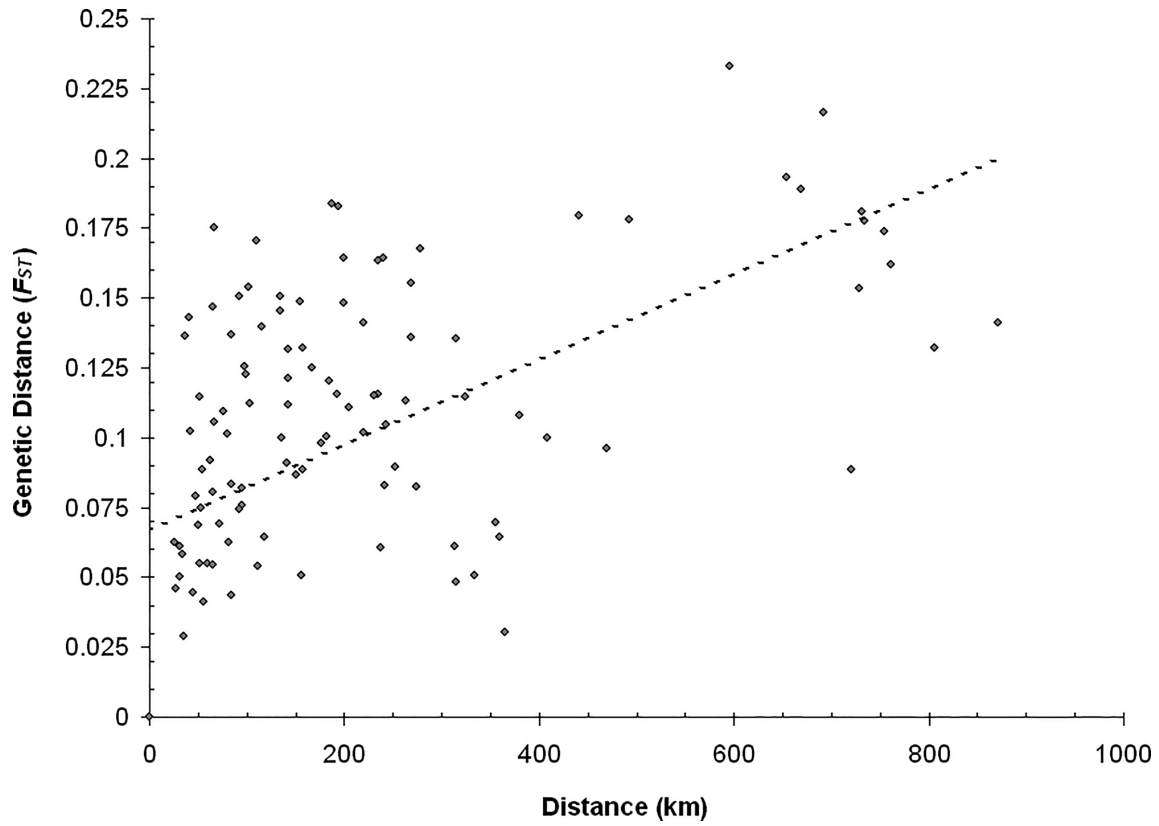

**Figure S2** - The relationship between geographical (km) and genetic ( $F_{ST}$ ) distances among all populations of *Senecio madagascariensis* Poir. included in this study by regression analysis ( $r^2 = 0.57$ ;  $P < 0.001$ ).
